# Supplementary material
Source: HighWire-hosted journal article supplement (http://molpharm.aspetjournals.org/highwire/filestream/76546/field_highwire_adjunct_files/3/Figure_4_SD.pdf)

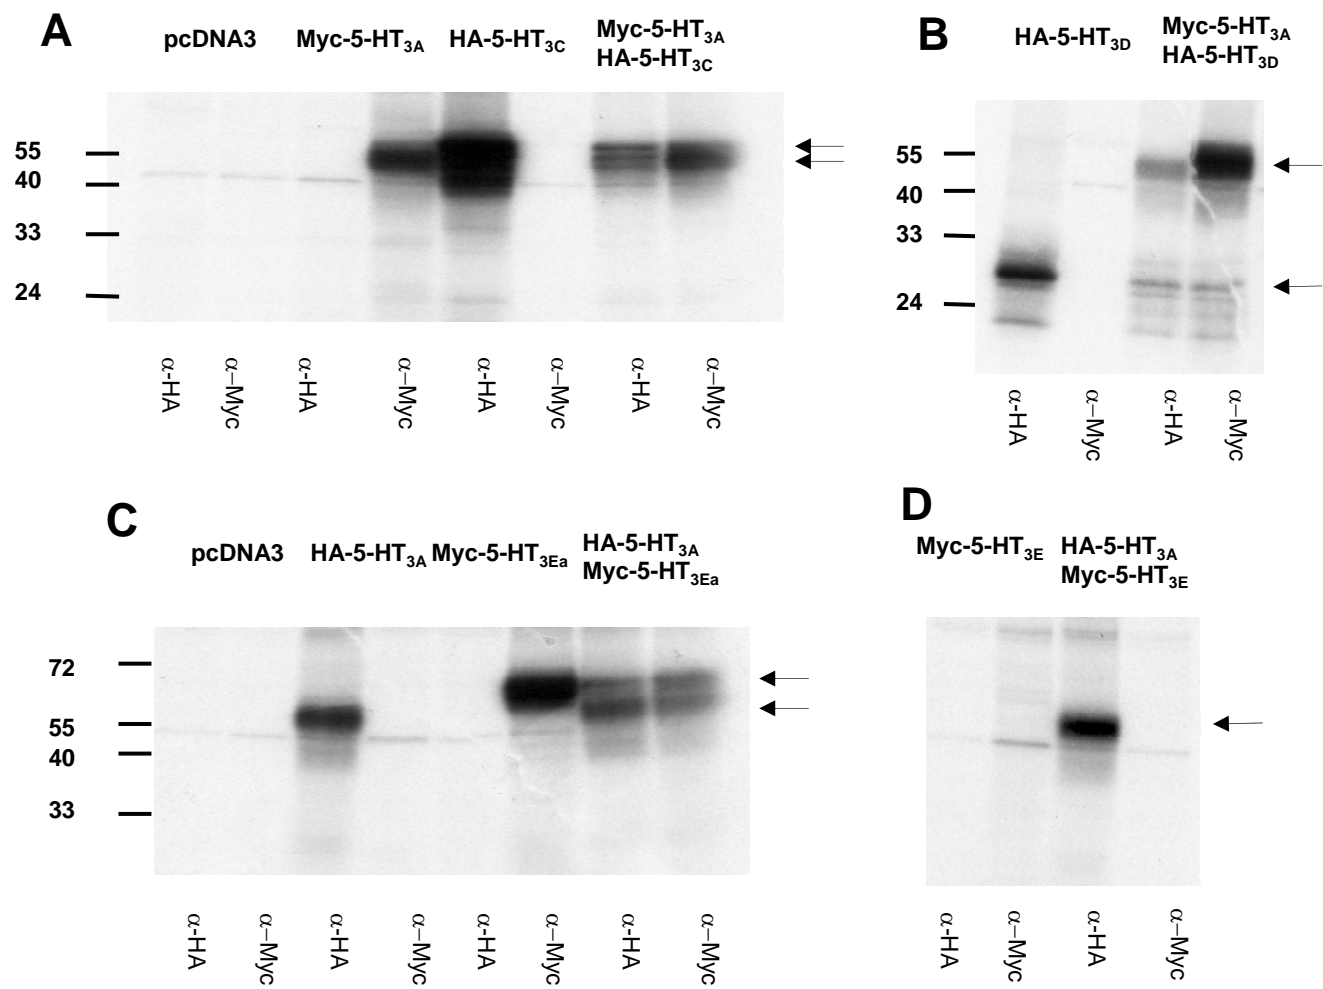

Figure 4

Supplement: Figure_4_SD.pdf [file Figure_4_SD.pdf]
